# Supplementary material
Source: PubMed Central journal article supplement (PMC4018819)
Supplement: NIHMS568659-supplement-Appendix_Tables.pdf [file NIHMS568659-supplement-Appendix_Tables.pdf]

**Table 4 (Appendix 1 Table 1): Fully Adjusted Multilevel Regression Analyses of BMI, Systolic Blood Pressure and Diastolic Blood Pressure**

|                        | BMI    |                 |         | Systolic Blood Pressure |                  |         | Diastolic Blood Pressure |               |         |
|------------------------|--------|-----------------|---------|-------------------------|------------------|---------|--------------------------|---------------|---------|
|                        | Beta   | 95% C.I.        | P-value | Beta                    | 95% C.I.         | P-value | Beta                     | 95% C.I.      | P-value |
| <i>.75 mile radius</i> |        |                 |         |                         |                  |         |                          |               |         |
| <b>Age</b>             |        |                 |         |                         |                  |         |                          |               |         |
| Born 1921 – 1925       | 0.303  | (-0.382,0.989)  | 0.386   | 8.814                   | (6.920,10.709)   | 0.000   | 3.468                    | (2.390,4.546) | 0.000   |
| Born 1926 - 1930       | 0.668  | (0.101,1.235)   | 0.021   | 8.710                   | (7.143,10.277)   | 0.000   | 5.325                    | (4.433,6.217) | 0.000   |
| Born 1931 - 1935       | 0.863  | (0.343,1.383)   | 0.001   | 4.686                   | (3.250,6.122)    | 0.000   | 5.312                    | (4.494,6.129) | 0.000   |
| Born 1936 - 1940       | 1.296  | (0.802,1.789)   | 0.000   | 0.458                   | (-0.906,1.821)   | 0.511   | 5.610                    | (4.834,6.386) | 0.000   |
| Born 1941 - 1945       | 1.479  | (0.897,2.061)   | 0.000   | -2.406                  | (-4.014,-0.797)  | 0.003   | 4.794                    | (3.879,5.710) | 0.000   |
| Born 1946 - 1950       | 0.341  | (-1.335,2.017)  | 0.690   | -9.210                  | (-13.841,-4.580) | 0.000   | 3.765                    | (1.131,6.400) | 0.005   |
| <b>Race/ethnicity</b>  |        |                 |         |                         |                  |         |                          |               |         |
| Black                  | 2.334  | (2.146,2.523)   | 0.000   | 4.063                   | (3.542,4.584)    | 0.000   | 2.693                    | (2.396,2.990) | 0.000   |
| Hispanic               | 0.669  | (0.407,0.930)   | 0.000   | -0.938                  | (-1.662,-0.214)  | 0.011   | 0.630                    | (0.216,1.043) | 0.003   |
| Other                  | -0.929 | (-1.212,-0.647) | 0.000   | 0.590                   | (-0.195,1.375)   | 0.140   | 1.309                    | (0.860,1.758) | 0.000   |
| <b>Education</b>       |        |                 |         |                         |                  |         |                          |               |         |
| Less than High School  | 1.323  | (1.089,1.557)   | 0.000   | 2.933                   | (2.287,3.580)    | 0.000   | 0.528                    | (0.161,0.896) | 0.005   |
| High School            | 0.908  | (0.761,1.054)   | 0.000   | 2.297                   | (1.892,2.702)    | 0.000   | 0.447                    | (0.217,0.677) | 0.000   |

|                                 | BMI    |                 |         | Systolic Blood Pressure |                 |         | Diastolic Blood Pressure |                 |         |
|---------------------------------|--------|-----------------|---------|-------------------------|-----------------|---------|--------------------------|-----------------|---------|
|                                 | Beta   | 95% C.I.        | P-value | Beta                    | 95% C.I.        | P-value | Beta                     | 95% C.I.        | P-value |
| Some college                    | 0.855  | (0.742,0.968)   | 0.000   | 1.728                   | (1.415,2.041)   | 0.000   | 0.619                    | (0.441,0.797)   | 0.000   |
| <b>Marital status</b>           |        |                 |         |                         |                 |         |                          |                 |         |
| Never married                   | 0.711  | (0.465,0.957)   | 0.000   | -0.601                  | (-1.280,0.079)  | 0.083   | 0.403                    | (0.017,0.790)   | 0.041   |
| Divorced or separated           | 0.499  | (0.358,0.641)   | 0.000   | -1.346                  | (-1.737,-0.956) | 0.000   | 0.937                    | (0.714,1.159)   | 0.000   |
| Widowed                         | -0.112 | (-0.251,0.026)  | 0.113   | 1.512                   | (1.129,1.896)   | 0.000   | -0.497                   | (-0.716,-0.279) | 0.000   |
| Marriage-like relationship      | 0.196  | (-0.174,0.566)  | 0.299   | -1.195                  | (-2.217,-0.173) | 0.022   | 0.871                    | (0.289,1.452)   | 0.003   |
| Income                          | -0.126 | (-0.163,-0.089) | 0.000   | -0.767                  | (-0.869,-0.664) | 0.000   | 0.208                    | (0.149,0.266)   | 0.000   |
| HRT arm, E-alone intervention   | 1.730  | (1.514,1.947)   | 0.000   | 1.957                   | (1.358,2.555)   | 0.000   | 0.736                    | (0.395,1.076)   | 0.000   |
| HRT arm, E-alone control        | 1.882  | (1.668,2.096)   | 0.000   | 1.133                   | (0.541,1.724)   | 0.000   | 0.662                    | (0.325,0.998)   | 0.000   |
| HRT arm, E+P intervention       | 0.799  | (0.609,0.988)   | 0.000   | 0.586                   | (0.062,1.110)   | 0.028   | 0.568                    | (0.270,0.866)   | 0.000   |
| HRT arm, E+P control            | 0.774  | (0.582,0.967)   | 0.000   | 0.091                   | (-0.442,0.624)  | 0.739   | 0.456                    | (0.153,0.760)   | 0.003   |
| DM arm, intervention            | 1.568  | (1.389,1.747)   | 0.000   | -0.313                  | (-0.808,0.182)  | 0.215   | 0.128                    | (-0.154,0.410)  | 0.375   |
| DM arm, control                 | 1.740  | (1.568,1.911)   | 0.000   | -0.259                  | (-0.734,0.216)  | 0.285   | 0.262                    | (-0.009,0.532)  | 0.058   |
| CAD arm, intervention           | 0.321  | (0.204,0.438)   | 0.000   | -0.496                  | (-0.819,-0.173) | 0.003   | 0.156                    | (-0.028,0.340)  | 0.097   |
| CAD arm, control                | 0.317  | (0.200,0.434)   | 0.000   | -0.469                  | (-0.793,-0.145) | 0.005   | 0.085                    | (-0.099,0.269)  | 0.364   |
| Urban                           | -0.129 | (-0.317,0.060)  | 0.182   | 0.044                   | (-0.473,0.562)  | 0.867   | -0.206                   | (-0.499,0.088)  | 0.170   |
| Neighborhood SES (census tract) | -0.057 | (-0.065,-0.050) | 0.000   | -0.052                  | (-0.071,-0.032) | 0.000   | -0.016                   | (-0.028,-0.005) | 0.005   |

|                                                                  | <b>BMI</b> |                 |         | <b>Systolic Blood Pressure</b> |                  |         | <b>Diastolic Blood Pressure</b> |                 |         |
|------------------------------------------------------------------|------------|-----------------|---------|--------------------------------|------------------|---------|---------------------------------|-----------------|---------|
|                                                                  | Beta       | 95% C.I.        | P-value | Beta                           | 95% C.I.         | P-value | Beta                            | 95% C.I.        | P-value |
| Population Density in 0.75 mile buffer                           | -0.139     | (-0.215,-0.062) | 0.000   | -0.471                         | (-0.682,-0.261)  | 0.000   | -0.337                          | (-0.458,-0.216) | 0.000   |
| Fast food restaurants in 0.75 mile buffer per person (log)       | 0.063      | (-0.004,0.129)  | 0.064   | -0.048                         | (-0.231,0.135)   | 0.607   | 0.008                           | (-0.096,0.112)  | 0.885   |
| Grocery stores/supermarkets in 0.75 mile buffer per person (log) | -0.155     | (-0.224,-0.085) | 0.000   | -0.121                         | (-0.313,0.071)   | 0.218   | -0.118                          | (-0.227,-0.009) | 0.035   |
| <b><i>1.5 mile radius</i></b>                                    |            |                 |         |                                |                  |         |                                 |                 |         |
| <b>Age</b>                                                       |            |                 |         |                                |                  |         |                                 |                 |         |
| Born 1921 – 1925                                                 | 0.302      | (-0.384,0.987)  | 0.388   | 8.814                          | (6.920,10.709)   | 0.000   | 3.459                           | (2.382,4.537)   | 0.000   |
| Born 1926 - 1930                                                 | 0.677      | (0.110,1.244)   | 0.019   | 8.711                          | (7.144,10.278)   | 0.000   | 5.328                           | (4.436,6.219)   | 0.000   |
| Born 1931 - 1935                                                 | 0.864      | (0.344,1.384)   | 0.001   | 4.678                          | (3.241,6.114)    | 0.000   | 5.305                           | (4.487,6.122)   | 0.000   |
| Born 1936 - 1940                                                 | 1.293      | (0.800,1.787)   | 0.000   | 0.453                          | (-0.911,1.816)   | 0.515   | 5.603                           | (4.827,6.379)   | 0.000   |
| Born 1941 - 1945                                                 | 1.475      | (0.893,2.057)   | 0.000   | -2.416                         | (-4.025,-0.808)  | 0.003   | 4.780                           | (3.864,5.695)   | 0.000   |
| Born 1946 - 1950                                                 | 0.328      | (-1.348,2.004)  | 0.701   | -9.235                         | (-13.865,-4.604) | 0.000   | 3.757                           | (1.123,6.391)   | 0.005   |
| <b>Race/ethnicity</b>                                            |            |                 |         |                                |                  |         |                                 |                 |         |
| Black                                                            | 2.365      | (2.176,2.553)   | 0.000   | 4.099                          | (3.578,4.621)    | 0.000   | 2.693                           | (2.396,2.990)   | 0.000   |
| Hispanic                                                         | 0.678      | (0.417,0.940)   | 0.000   | -0.947                         | (-1.671,-0.223)  | 0.010   | 0.633                           | (0.219,1.046)   | 0.003   |
| Other                                                            | -0.920     | (-1.202,-0.637) | 0.000   | 0.590                          | (-0.195,1.374)   | 0.141   | 1.312                           | (0.863,1.761)   | 0.000   |
| <b>Education</b>                                                 |            |                 |         |                                |                  |         |                                 |                 |         |

|                               | BMI    |                 |         | Systolic Blood Pressure |                 |         | Diastolic Blood Pressure |                 |         |
|-------------------------------|--------|-----------------|---------|-------------------------|-----------------|---------|--------------------------|-----------------|---------|
|                               | Beta   | 95% C.I.        | P-value | Beta                    | 95% C.I.        | P-value | Beta                     | 95% C.I.        | P-value |
| Less than High School         | 1.320  | (1.086,1.554)   | 0.000   | 2.934                   | (2.288,3.580)   | 0.000   | 0.524                    | (0.156,0.891)   | 0.005   |
| High School                   | 0.901  | (0.755,1.048)   | 0.000   | 2.289                   | (1.884,2.694)   | 0.000   | 0.441                    | (0.211,0.672)   | 0.000   |
| Some college                  | 0.848  | (0.735,0.962)   | 0.000   | 1.721                   | (1.408,2.034)   | 0.000   | 0.615                    | (0.437,0.793)   | 0.000   |
| <b>Marital status</b>         |        |                 |         |                         |                 |         |                          |                 |         |
| Never married                 | 0.709  | (0.463,0.954)   | 0.000   | -0.622                  | (-1.301,0.057)  | 0.073   | 0.409                    | (0.023,0.795)   | 0.038   |
| Divorced or separated         | 0.499  | (0.358,0.640)   | 0.000   | -1.356                  | (-1.746,-0.966) | 0.000   | 0.941                    | (0.719,1.163)   | 0.000   |
| Widowed                       | -0.108 | (-0.247,0.030)  | 0.126   | 1.512                   | (1.129,1.896)   | 0.000   | -0.490                   | (-0.708,-0.272) | 0.000   |
| Marriage-like relationship    | 0.200  | (-0.170,0.569)  | 0.290   | -1.198                  | (-2.220,-0.176) | 0.022   | 0.875                    | (0.294,1.457)   | 0.003   |
| Income                        | -0.123 | (-0.160,-0.086) | 0.000   | -0.763                  | (-0.865,-0.660) | 0.000   | 0.208                    | (0.150,0.266)   | 0.000   |
| HRT arm, E-alone intervention | 1.725  | (1.509,1.942)   | 0.000   | 1.952                   | (1.354,2.551)   | 0.000   | 0.730                    | (0.389,1.070)   | 0.000   |
| HRT arm, E-alone control      | 1.880  | (1.666,2.094)   | 0.000   | 1.133                   | (0.541,1.724)   | 0.000   | 0.657                    | (0.320,0.993)   | 0.000   |
| HRT arm, E+P intervention     | 0.797  | (0.608,0.987)   | 0.000   | 0.585                   | (0.061,1.109)   | 0.029   | 0.567                    | (0.269,0.865)   | 0.000   |
| HRT arm, E+P control          | 0.770  | (0.577,0.963)   | 0.000   | 0.092                   | (-0.442,0.625)  | 0.736   | 0.456                    | (0.153,0.760)   | 0.003   |
| DM arm, intervention          | 1.569  | (1.390,1.748)   | 0.000   | -0.311                  | (-0.806,0.184)  | 0.218   | 0.131                    | (-0.150,0.413)  | 0.361   |
| DM arm, control               | 1.739  | (1.567,1.911)   | 0.000   | -0.257                  | (-0.732,0.218)  | 0.289   | 0.265                    | (-0.006,0.535)  | 0.055   |
| CAD arm, intervention         | 0.320  | (0.203,0.437)   | 0.000   | -0.496                  | (-0.819,-0.173) | 0.003   | 0.153                    | (-0.031,0.337)  | 0.103   |
| CAD arm, control              | 0.313  | (0.196,0.430)   | 0.000   | -0.472                  | (-0.795,-0.148) | 0.004   | 0.082                    | (-0.102,0.266)  | 0.383   |

|                                                                 | <b>BMI</b> |                 |         | <b>Systolic Blood Pressure</b> |                  |         | <b>Diastolic Blood Pressure</b> |                 |         |
|-----------------------------------------------------------------|------------|-----------------|---------|--------------------------------|------------------|---------|---------------------------------|-----------------|---------|
|                                                                 | Beta       | 95% C.I.        | P-value | Beta                           | 95% C.I.         | P-value | Beta                            | 95% C.I.        | P-value |
| Urban                                                           | -0.046     | (-0.222,0.130)  | 0.607   | -0.107                         | (-0.590,0.375)   | 0.663   | -0.170                          | (-0.444,0.104)  | 0.223   |
| Neighborhood SES                                                | -0.057     | (-0.064,-0.050) | 0.000   | -0.050                         | (-0.070,-0.030)  | 0.000   | -0.018                          | (-0.029,-0.007) | 0.002   |
| Population Density in 1.5 mile buffer                           | -0.139     | (-0.209,-0.068) | 0.000   | -0.366                         | (-0.561,-0.171)  | 0.000   | -0.378                          | (-0.489,-0.266) | 0.000   |
| Fast food restaurants in 1.5 mile buffer per person (log)       | 0.134      | (0.060,0.208)   | 0.000   | 0.028                          | (-0.175,0.232)   | 0.785   | -0.050                          | (-0.166,0.066)  | 0.400   |
| Grocery stores/supermarkets in 1.5 mile buffer per person (log) | -0.155     | (-0.233,-0.077) | 0.000   | -0.203                         | (-0.418,0.013)   | 0.065   | -0.162                          | (-0.285,-0.039) | 0.010   |
| <b><i>3.0 mile radius</i></b>                                   |            |                 |         |                                |                  |         |                                 |                 |         |
| <b>Age</b>                                                      |            |                 |         |                                |                  |         |                                 |                 |         |
| Born 1921 – 1925                                                | 0.311      | (-0.375,0.996)  | 0.374   | 8.837                          | (6.943,10.732)   | 0.000   | 3.481                           | (2.404,4.559)   | 0.000   |
| Born 1926 - 1930                                                | 0.675      | (0.108,1.242)   | 0.020   | 8.714                          | (7.147,10.281)   | 0.000   | 5.337                           | (4.446,6.229)   | 0.000   |
| Born 1931 - 1935                                                | 0.861      | (0.341,1.380)   | 0.001   | 4.674                          | (3.238,6.111)    | 0.000   | 5.298                           | (4.481,6.115)   | 0.000   |
| Born 1936 - 1940                                                | 1.294      | (0.800,1.787)   | 0.000   | 0.458                          | (-0.906,1.821)   | 0.510   | 5.602                           | (4.826,6.377)   | 0.000   |
| Born 1941 - 1945                                                | 1.466      | (0.884,2.048)   | 0.000   | -2.430                         | (-4.039,-0.821)  | 0.003   | 4.771                           | (3.856,5.686)   | 0.000   |
| Born 1946 - 1950                                                | 0.332      | (-1.343,2.008)  | 0.697   | -9.245                         | (-13.876,-4.615) | 0.000   | 3.753                           | (1.119,6.386)   | 0.005   |
| <b>Race/ethnicity</b>                                           |            |                 |         |                                |                  |         |                                 |                 |         |
| Black                                                           | 2.376      | (2.188,2.564)   | 0.000   | 4.166                          | (3.645,4.686)    | 0.000   | 2.749                           | (2.453,3.045)   | 0.000   |
| Hispanic                                                        | 0.687      | (0.426,0.949)   | 0.000   | -0.925                         | (-1.649,-0.201)  | 0.012   | 0.650                           | (0.237,1.063)   | 0.002   |

|                               | BMI    |                 |         | Systolic Blood Pressure |                 |         | Diastolic Blood Pressure |                 |         |
|-------------------------------|--------|-----------------|---------|-------------------------|-----------------|---------|--------------------------|-----------------|---------|
|                               | Beta   | 95% C.I.        | P-value | Beta                    | 95% C.I.        | P-value | Beta                     | 95% C.I.        | P-value |
| Other                         | -0.917 | (-1.199,-0.634) | 0.000   | 0.598                   | (-0.186,1.383)  | 0.135   | 1.321                    | (0.873,1.770)   | 0.000   |
| <b>Education</b>              |        |                 |         |                         |                 |         |                          |                 |         |
| Less than High School         | 1.315  | (1.081,1.549)   | 0.000   | 2.931                   | (2.284,3.577)   | 0.000   | 0.518                    | (0.151,0.886)   | 0.006   |
| High School                   | 0.894  | (0.747,1.040)   | 0.000   | 2.277                   | (1.871,2.682)   | 0.000   | 0.430                    | (0.199,0.660)   | 0.000   |
| Some college                  | 0.843  | (0.730,0.956)   | 0.000   | 1.711                   | (1.398,2.024)   | 0.000   | 0.605                    | (0.427,0.783)   | 0.000   |
| <b>Marital status</b>         |        |                 |         |                         |                 |         |                          |                 |         |
| Never married                 | 0.721  | (0.476,0.967)   | 0.000   | -0.613                  | (-1.292,0.066)  | 0.077   | 0.419                    | (0.032,0.805)   | 0.034   |
| Divorced or separated         | 0.505  | (0.364,0.647)   | 0.000   | -1.354                  | (-1.744,-0.963) | 0.000   | 0.943                    | (0.721,1.165)   | 0.000   |
| Widowed                       | -0.104 | (-0.243,0.034)  | 0.141   | 1.515                   | (1.132,1.899)   | 0.000   | -0.484                   | (-0.702,-0.266) | 0.000   |
| Marriage-like relationship    | 0.199  | (-0.171,0.568)  | 0.292   | -1.200                  | (-2.222,-0.178) | 0.021   | 0.874                    | (0.292,1.455)   | 0.003   |
| Income                        | -0.122 | (-0.159,-0.085) | 0.000   | -0.758                  | (-0.860,-0.655) | 0.000   | 0.213                    | (0.155,0.271)   | 0.000   |
| HRT arm, E-alone intervention | 1.723  | (1.507,1.940)   | 0.000   | 1.944                   | (1.346,2.543)   | 0.000   | 0.724                    | (0.384,1.065)   | 0.000   |
| HRT arm, E-alone control      | 1.874  | (1.660,2.088)   | 0.000   | 1.123                   | (0.531,1.714)   | 0.000   | 0.650                    | (0.314,0.987)   | 0.000   |
| HRT arm, E+P intervention     | 0.798  | (0.608,0.987)   | 0.000   | 0.580                   | (0.056,1.104)   | 0.030   | 0.563                    | (0.265,0.861)   | 0.000   |
| HRT arm, E+P control          | 0.770  | (0.577,0.963)   | 0.000   | 0.084                   | (-0.449,0.617)  | 0.757   | 0.450                    | (0.146,0.753)   | 0.004   |
| DM arm, intervention          | 1.570  | (1.391,1.749)   | 0.000   | -0.313                  | (-0.808,0.182)  | 0.215   | 0.131                    | (-0.151,0.412)  | 0.364   |
| DM arm, control               | 1.741  | (1.569,1.913)   | 0.000   | -0.260                  | (-0.735,0.215)  | 0.284   | 0.265                    | (-0.006,0.535)  | 0.055   |

|                                                                 | <b>BMI</b> |                 |         | <b>Systolic Blood Pressure</b> |                 |         | <b>Diastolic Blood Pressure</b> |                 |         |
|-----------------------------------------------------------------|------------|-----------------|---------|--------------------------------|-----------------|---------|---------------------------------|-----------------|---------|
|                                                                 | Beta       | 95% C.I.        | P-value | Beta                           | 95% C.I.        | P-value | Beta                            | 95% C.I.        | P-value |
| CAD arm, intervention                                           | 0.316      | (0.199,0.433)   | 0.000   | -0.502                         | (-0.825,-0.178) | 0.002   | 0.149                           | (-0.035,0.332)  | 0.114   |
| CAD arm, control                                                | 0.312      | (0.194,0.429)   | 0.000   | -0.476                         | (-0.799,-0.152) | 0.004   | 0.076                           | (-0.108,0.261)  | 0.417   |
| Urban                                                           | -0.003     | (-0.172,0.167)  | 0.975   | -0.042                         | (-0.508,0.423)  | 0.859   | -0.100                          | (-0.364,0.164)  | 0.458   |
| Neighborhood SES                                                | -0.057     | (-0.064,-0.050) | 0.000   | -0.047                         | (-0.066,-0.028) | 0.000   | -0.017                          | (-0.028,-0.006) | 0.003   |
| Population Density in 3.0 mile buffer                           | -0.182     | (-0.254,-0.110) | 0.000   | -0.427                         | (-0.625,-0.228) | 0.000   | -0.415                          | (-0.529,-0.302) | 0.000   |
| Fast food restaurants in 3.0 mile buffer per person (log)       | 0.174      | (0.071,0.276)   | 0.001   | 0.208                          | (-0.076,0.492)  | 0.151   | 0.022                           | (-0.142,0.185)  | 0.794   |
| Grocery stores/supermarkets in 3.0 mile buffer per person (log) | -0.206     | (-0.311,-0.101) | 0.000   | -0.169                         | (-0.461,0.123)  | 0.256   | -0.243                          | (-0.410,-0.076) | 0.004   |

**Table 5 (Appendix 1 Table 2): Random Effects Logistic Regression Analyses of Obesity and Hypertension**

| <i>.75 mile radius</i> | <b>Obesity (BMI <math>\geq</math> 30)</b> |               |         | <b>Hypertension</b> |               |         |
|------------------------|-------------------------------------------|---------------|---------|---------------------|---------------|---------|
|                        | Odds Ratio                                | 95% C.I.      | P-value | Odds Ratio          | 95% C.I.      | P-value |
| <b>Age</b>             |                                           |               |         |                     |               |         |
| Born 1921 – 1925       | 1.304                                     | (1.027,1.656) | 0.030   | 0.875               | (0.688,1.113) | 0.278   |
| Born 1926 - 1930       | 1.196                                     | (0.980,1.460) | 0.078   | 0.693               | (0.569,0.843) | 0.000   |
| Born 1931 - 1935       | 1.220                                     | (1.017,1.462) | 0.032   | 0.644               | (0.538,0.771) | 0.000   |
| Born 1936 - 1940       | 1.412                                     | (1.189,1.676) | 0.000   | 0.443               | (0.372,0.528) | 0.000   |
| Born 1941 - 1945       | 1.502                                     | (1.225,1.841) | 0.000   | 0.325               | (0.261,0.404) | 0.000   |
| Born 1946 - 1950       | 1.216                                     | (0.678,2.182) | 0.512   | 0.183               | (0.090,0.373) | 0.000   |
| <b>Race/ethnicity</b>  |                                           |               |         |                     |               |         |
| Black                  | 1.866                                     | (1.748,1.991) | 0.000   | 2.309               | (2.154,2.475) | 0.000   |
| Hispanic               | 1.214                                     | (1.109,1.329) | 0.000   | 0.796               | (0.729,0.869) | 0.000   |
| Other                  | 0.751                                     | (0.676,0.834) | 0.000   | 1.178               | (1.073,1.294) | 0.001   |
| <b>Education</b>       |                                           |               |         |                     |               |         |
| Less than High School  | 1.418                                     | (1.307,1.539) | 0.000   | 1.476               | (1.355,1.607) | 0.000   |
| High School            | 1.299                                     | (1.233,1.368) | 0.000   | 1.328               | (1.262,1.398) | 0.000   |



|                               | <b>Obesity (BMI <math>\geq</math> 30)</b> |               |       | <b>Hypertension</b> |               |       |
|-------------------------------|-------------------------------------------|---------------|-------|---------------------|---------------|-------|
| Some college                  | 1.269                                     | (1.219,1.322) | 0.000 | 1.206               | (1.159,1.254) | 0.000 |
| <b>Marital status</b>         |                                           |               |       |                     |               |       |
| Never married                 | 1.136                                     | (1.042,1.240) | 0.004 | 0.930               | (0.854,1.013) | 0.097 |
| Divorced or separated         | 1.114                                     | (1.060,1.171) | 0.000 | 0.798               | (0.759,0.838) | 0.000 |
| Widowed                       | 0.946                                     | (0.900,0.993) | 0.026 | 1.254               | (1.194,1.318) | 0.000 |
| Marriage-like relationship    | 1.024                                     | (0.897,1.168) | 0.729 | 0.843               | (0.742,0.958) | 0.009 |
| Income                        | 0.956                                     | (0.943,0.969) | 0.000 | 0.908               | (0.897,0.920) | 0.000 |
| HRT arm, E-alone intervention | 1.678                                     | (1.556,1.810) | 0.000 | 1.395               | (1.290,1.509) | 0.000 |
| HRT arm, E-alone control      | 1.779                                     | (1.651,1.917) | 0.000 | 1.170               | (1.084,1.263) | 0.000 |
| HRT arm, E+P intervention     | 1.292                                     | (1.208,1.381) | 0.000 | 1.027               | (0.961,1.097) | 0.434 |
| HRT arm, E+P control          | 1.276                                     | (1.192,1.365) | 0.000 | 0.938               | (0.877,1.003) | 0.062 |
| DM arm, intervention          | 1.644                                     | (1.544,1.751) | 0.000 | 1.061               | (0.997,1.130) | 0.064 |
| DM arm, control               | 1.723                                     | (1.622,1.830) | 0.000 | 1.151               | (1.084,1.223) | 0.000 |
| CAD arm, intervention         | 1.081                                     | (1.037,1.127) | 0.000 | 0.979               | (0.940,1.020) | 0.315 |
| CAD arm, control              | 1.102                                     | (1.057,1.149) | 0.000 | 0.978               | (0.939,1.019) | 0.292 |
| Urban                         | 0.963                                     | (0.901,1.030) | 0.273 | 0.969               | (0.909,1.033) | 0.336 |
| Neighborhood SES              | 0.983                                     | (0.980,0.985) | 0.000 | 0.993               | (0.990,0.996) | 0.000 |

|                                                                  | <b>Obesity (BMI <math>\geq</math> 30)</b> |                 |                | <b>Hypertension</b> |                 |                |
|------------------------------------------------------------------|-------------------------------------------|-----------------|----------------|---------------------|-----------------|----------------|
| Population Density in 0.75 mile buffer                           | 0.965                                     | (0.940,0.992)   | 0.011          | 0.985               | (0.961,1.011)   | 0.254          |
| Fast food restaurants in 0.75 mile buffer per person (log)       | 1.019                                     | (0.995,1.043)   | 0.118          | 1.021               | (0.998,1.045)   | 0.075          |
| Grocery stores/supermarkets in 0.75 mile buffer per person (log) | 0.951                                     | (0.928,0.975)   | 0.000          | 0.955               | (0.932,0.978)   | 0.000          |
| <b><i>1.5 mile radius</i></b>                                    | <b>Odds Ratio</b>                         | <b>95% C.I.</b> | <b>P-value</b> | <b>Odds Ratio</b>   | <b>95% C.I.</b> | <b>CI high</b> |
| <b>Age</b>                                                       |                                           |                 |                |                     |                 |                |
| Born 1921 – 1925                                                 | 1.303                                     | (1.026,1.655)   | 0.030          | 0.873               | (0.686,1.110)   | 0.267          |
| Born 1926 - 1930                                                 | 1.200                                     | (0.983,1.464)   | 0.073          | 0.692               | (0.569,0.843)   | 0.000          |
| Born 1931 - 1935                                                 | 1.221                                     | (1.018,1.463)   | 0.031          | 0.644               | (0.538,0.772)   | 0.000          |
| Born 1936 - 1940                                                 | 1.411                                     | (1.188,1.675)   | 0.000          | 0.442               | (0.371,0.527)   | 0.000          |
| Born 1941 - 1945                                                 | 1.501                                     | (1.224,1.839)   | 0.000          | 0.325               | (0.261,0.404)   | 0.000          |
| Born 1946 - 1950                                                 | 1.212                                     | (0.676,2.173)   | 0.520          | 0.183               | (0.090,0.373)   | 0.000          |
| <b>Race/ethnicity</b>                                            |                                           |                 |                |                     |                 |                |
| Black                                                            | 1.883                                     | (1.764,2.010)   | 0.000          | 2.300               | (2.145,2.465)   | 0.000          |
| Hispanic                                                         | 1.217                                     | (1.111,1.332)   | 0.000          | 0.794               | (0.727,0.866)   | 0.000          |

|                               | <b>Obesity (BMI <math>\geq</math> 30)</b> |               |       | <b>Hypertension</b> |               |       |
|-------------------------------|-------------------------------------------|---------------|-------|---------------------|---------------|-------|
| Other                         | 0.753                                     | (0.678,0.837) | 0.000 | 1.176               | (1.071,1.292) | 0.001 |
| <b>Education</b>              |                                           |               |       |                     |               |       |
| Less than High School         | 1.417                                     | (1.306,1.538) | 0.000 | 1.475               | (1.355,1.606) | 0.000 |
| High School                   | 1.296                                     | (1.231,1.365) | 0.000 | 1.329               | (1.263,1.399) | 0.000 |
| Some college                  | 1.267                                     | (1.217,1.320) | 0.000 | 1.206               | (1.160,1.255) | 0.000 |
| <b>Marital status</b>         |                                           |               |       |                     |               |       |
| Never married                 | 1.135                                     | (1.040,1.238) | 0.004 | 0.926               | (0.850,1.009) | 0.079 |
| Divorced or separated         | 1.114                                     | (1.060,1.171) | 0.000 | 0.797               | (0.758,0.837) | 0.000 |
| Widowed                       | 0.946                                     | (0.901,0.994) | 0.029 | 1.253               | (1.193,1.317) | 0.000 |
| Marriage-like relationship    | 1.024                                     | (0.897,1.169) | 0.721 | 0.842               | (0.741,0.957) | 0.008 |
| Income                        | 0.957                                     | (0.944,0.969) | 0.000 | 0.908               | (0.896,0.920) | 0.000 |
| HRT arm, E-alone intervention | 1.676                                     | (1.554,1.807) | 0.000 | 1.395               | (1.290,1.509) | 0.000 |
| HRT arm, E-alone control      | 1.778                                     | (1.650,1.916) | 0.000 | 1.171               | (1.085,1.264) | 0.000 |
| HRT arm, E+P intervention     | 1.291                                     | (1.208,1.380) | 0.000 | 1.028               | (0.962,1.099) | 0.413 |
| HRT arm, E+P control          | 1.274                                     | (1.190,1.364) | 0.000 | 0.939               | (0.877,1.004) | 0.065 |
| DM arm, intervention          | 1.644                                     | (1.544,1.751) | 0.000 | 1.062               | (0.998,1.131) | 0.060 |
| DM arm, control               | 1.723                                     | (1.622,1.830) | 0.000 | 1.152               | (1.085,1.224) | 0.000 |

|                                                                 | <b>Obesity (BMI <math>\geq</math> 30)</b> |                 |                | <b>Hypertension</b> |                 |                |
|-----------------------------------------------------------------|-------------------------------------------|-----------------|----------------|---------------------|-----------------|----------------|
| CAD arm, intervention                                           | 1.081                                     | (1.036,1.127)   | 0.000          | 0.979               | (0.940,1.020)   | 0.313          |
| CAD arm, control                                                | 1.101                                     | (1.056,1.147)   | 0.000          | 0.978               | (0.939,1.019)   | 0.289          |
| Urban                                                           | 0.989                                     | (0.929,1.053)   | 0.732          | 0.971               | (0.915,1.030)   | 0.330          |
| Neighborhood SES                                                | 0.983                                     | (0.980,0.985)   | 0.000          | 0.994               | (0.991,0.996)   | 0.000          |
| Population Density in 1.5 mile buffer                           | 0.969                                     | (0.945,0.993)   | 0.013          | 0.994               | (0.971,1.017)   | 0.610          |
| Fast food restaurants in 1.5 mile buffer per person (log)       | 1.044                                     | (1.017,1.072)   | 0.001          | 1.002               | (0.977,1.027)   | 0.876          |
| Grocery stores/supermarkets in 1.5 mile buffer per person (log) | 0.952                                     | (0.926,0.979)   | 0.001          | 0.970               | (0.944,0.995)   | 0.021          |
| <b><i>3.0 mile radius</i></b>                                   | <b>Odds Ratio</b>                         | <b>95% C.I.</b> | <b>P-value</b> | <b>Odds Ratio</b>   | <b>95% C.I.</b> | <b>CI high</b> |
| <b>Age</b>                                                      |                                           |                 |                |                     |                 |                |
| Born 1921 – 1925                                                | 1.307                                     | (1.029,1.660)   | 0.028          | 0.875               | (0.688,1.113)   | 0.277          |
| Born 1926 - 1930                                                | 1.199                                     | (0.983,1.463)   | 0.074          | 0.693               | (0.569,0.844)   | 0.000          |
| Born 1931 - 1935                                                | 1.220                                     | (1.018,1.463)   | 0.032          | 0.645               | (0.539,0.772)   | 0.000          |
| Born 1936 - 1940                                                | 1.412                                     | (1.189,1.676)   | 0.000          | 0.443               | (0.372,0.528)   | 0.000          |
| Born 1941 - 1945                                                | 1.496                                     | (1.220,1.835)   | 0.000          | 0.325               | (0.261,0.405)   | 0.000          |

|                               | <b>Obesity (BMI <math>\geq</math> 30)</b> |               |       | <b>Hypertension</b> |               |       |
|-------------------------------|-------------------------------------------|---------------|-------|---------------------|---------------|-------|
| Born 1946 - 1950              | 1.213                                     | (0.676,2.177) | 0.517 | 0.183               | (0.090,0.373) | 0.000 |
| <b>Race/ethnicity</b>         |                                           |               |       |                     |               |       |
| Black                         | 1.891                                     | (1.772,2.018) | 0.000 | 2.314               | (2.159,2.481) | 0.000 |
| Hispanic                      | 1.222                                     | (1.116,1.338) | 0.000 | 0.797               | (0.730,0.870) | 0.000 |
| Other                         | 0.755                                     | (0.679,0.838) | 0.000 | 1.180               | (1.074,1.296) | 0.001 |
| <b>Education</b>              |                                           |               |       |                     |               |       |
| Less than High School         | 1.415                                     | (1.304,1.535) | 0.000 | 1.476               | (1.355,1.607) | 0.000 |
| High School                   | 1.294                                     | (1.228,1.363) | 0.000 | 1.329               | (1.262,1.398) | 0.000 |
| Some college                  | 1.265                                     | (1.215,1.318) | 0.000 | 1.206               | (1.159,1.254) | 0.000 |
| <b>Marital status</b>         |                                           |               |       |                     |               |       |
| Never married                 | 1.140                                     | (1.045,1.243) | 0.003 | 0.927               | (0.851,1.009) | 0.081 |
| Divorced or separated         | 1.116                                     | (1.062,1.173) | 0.000 | 0.797               | (0.759,0.837) | 0.000 |
| Widowed                       | 0.948                                     | (0.902,0.996) | 0.033 | 1.254               | (1.194,1.317) | 0.000 |
| Marriage-like relationship    | 1.025                                     | (0.898,1.170) | 0.718 | 0.842               | (0.741,0.957) | 0.008 |
| Income                        | 0.957                                     | (0.944,0.970) | 0.000 | 0.908               | (0.897,0.920) | 0.000 |
| HRT arm, E-alone intervention | 1.674                                     | (1.552,1.805) | 0.000 | 1.394               | (1.289,1.508) | 0.000 |
| HRT arm, E-alone control      | 1.774                                     | (1.646,1.912) | 0.000 | 1.170               | (1.084,1.263) | 0.000 |

|                                                                 | <b>Obesity (BMI <math>\geq</math> 30)</b> |               |       | <b>Hypertension</b> |               |       |
|-----------------------------------------------------------------|-------------------------------------------|---------------|-------|---------------------|---------------|-------|
| HRT arm, E+P intervention                                       | 1.291                                     | (1.208,1.380) | 0.000 | 1.027               | (0.961,1.098) | 0.429 |
| HRT arm, E+P control                                            | 1.274                                     | (1.190,1.363) | 0.000 | 0.937               | (0.876,1.003) | 0.060 |
| DM arm, intervention                                            | 1.645                                     | (1.545,1.752) | 0.000 | 1.062               | (0.997,1.131) | 0.062 |
| DM arm, control                                                 | 1.724                                     | (1.623,1.831) | 0.000 | 1.152               | (1.084,1.224) | 0.000 |
| CAD arm, intervention                                           | 1.079                                     | (1.035,1.125) | 0.000 | 0.979               | (0.940,1.020) | 0.314 |
| CAD arm, control                                                | 1.100                                     | (1.055,1.147) | 0.000 | 0.978               | (0.939,1.019) | 0.295 |
| Urban                                                           | 1.015                                     | (0.955,1.078) | 0.634 | 0.988               | (0.933,1.047) | 0.690 |
| Neighborhood SES                                                | 0.983                                     | (0.980,0.985) | 0.000 | 0.994               | (0.992,0.996) | 0.000 |
| Population Density in 3.0 mile buffer                           | 0.949                                     | (0.925,0.973) | 0.000 | 0.990               | (0.967,1.014) | 0.402 |
| Fast food restaurants in 3.0 mile buffer per person (log)       | 1.060                                     | (1.022,1.099) | 0.002 | 1.022               | (0.988,1.057) | 0.202 |
| Grocery stores/supermarkets in 3.0 mile buffer per person (log) | 0.952                                     | (0.917,0.988) | 0.009 | 0.985               | (0.952,1.020) | 0.397 |

**Table 6 (Appendix 1 Table 3): Sensitivity Analysis**

|                                                          | <b>Main Analysis</b> | <b>Sensitivity Analysis 1</b> | <b>Sensitivity Analysis 2</b> | <b>Sensitivity Analysis 3</b> |
|----------------------------------------------------------|----------------------|-------------------------------|-------------------------------|-------------------------------|
| <b>BMI</b>                                               |                      |                               |                               |                               |
| Neighborhood SES                                         | -0.057 <sup>c</sup>  | -0.054 <sup>c</sup>           | -0.051 <sup>c</sup>           | -0.054 <sup>c</sup>           |
| Fast food restaurants per person in 1.5 mile buffer      | 0.138 <sup>c</sup>   | 0.149 <sup>c</sup>            | 0.126 <sup>c</sup>            | 0.129 <sup>c</sup>            |
| Grocery stores/supermarket per person in 1.5 mile buffer | -0.156 <sup>c</sup>  | -0.143 <sup>c</sup>           | -0.144 <sup>c</sup>           | -0.140 <sup>c</sup>           |
| Physical Activity                                        | ----                 | ----                          | -0.085 <sup>c</sup>           | ----                          |
| BP Medication                                            | ----                 | ----                          | ----                          | 2.413 <sup>c</sup>            |
| <b>Systolic BP</b>                                       |                      |                               |                               |                               |
| Neighborhood SES                                         | -0.050 <sup>c</sup>  | -0.046 <sup>c</sup>           | -0.047 <sup>c</sup>           | -0.046 <sup>c</sup>           |
| Fast food restaurants per person in 1.5 mile buffer      | 0.031                | 0.083                         | 0.025                         | 0.017                         |
| Grocery stores/supermarket per person in 1.5 mile buffer | -0.201               | -0.205                        | -0.196                        | -0.175                        |
| Physical Activity                                        | ----                 | ----                          | -0.041 <sup>c</sup>           | ----                          |
| BP Medication                                            | ----                 | ----                          | ----                          | 3.941 <sup>c</sup>            |
| <b>Diastolic BP</b>                                      |                      |                               |                               |                               |
| Neighborhood SES                                         | -0.018 <sup>c</sup>  | -0.018 <sup>c</sup>           | -0.017 <sup>c</sup>           | -0.018 <sup>c</sup>           |
| Fast food restaurants per person in 1.5 mile buffer      | -0.05                | 0.015                         | -0.051                        | -0.049                        |
| Grocery stores/supermarket per person in 1.5 mile buffer | -0.161 <sup>b</sup>  | -0.233 <sup>c</sup>           | -0.160 <sup>c</sup>           | -0.164 <sup>c</sup>           |
| Physical Activity                                        | ----                 | ----                          | -0.010 <sup>c</sup>           | ----                          |
| BP Medication                                            | ----                 | ----                          | ----                          | -0.424 <sup>c</sup>           |
| <b>Obesity</b>                                           |                      |                               |                               |                               |
| Neighborhood SES                                         | 0.983 <sup>c</sup>   | 0.984 <sup>c</sup>            | 0.984 <sup>c</sup>            | 0.983 <sup>c</sup>            |
| Fast food restaurants per person in 1.5 mile buffer      | 1.044 <sup>c</sup>   | 1.052 <sup>c</sup>            | 1.043 <sup>c</sup>            | 1.043 <sup>c</sup>            |
| Grocery stores/supermarket per person in 1.5 mile buffer | 0.952 <sup>c</sup>   | 0.952 <sup>c</sup>            | 0.956 <sup>c</sup>            | 0.956 <sup>c</sup>            |
| Physical Activity                                        | ----                 | ----                          | 0.971 <sup>c</sup>            | ----                          |
| BP Medication                                            | ----                 | ----                          | ----                          | 2.069 <sup>c</sup>            |
| <b>Hypertension</b>                                      |                      |                               |                               |                               |
| Neighborhood SES                                         | 0.994 <sup>c</sup>   | 0.994 <sup>c</sup>            | 0.994 <sup>c</sup>            | 0.995 <sup>c</sup>            |
| Fast food restaurants per person in 1.5 mile buffer      | 1.002                | 1.011                         | 1.001                         | 0.988                         |
| Grocery stores/supermarket per person in 1.5 mile buffer | 0.970 <sup>a</sup>   | 0.967 <sup>a</sup>            | 0.971 <sup>a</sup>            | 0.982                         |

|                   |      |      |                    |                     |
|-------------------|------|------|--------------------|---------------------|
| Physical Activity | ---- | ---- | 0.990 <sup>c</sup> | ----                |
| BP Medication     | ---- | ---- | ----               | 20.780 <sup>c</sup> |

<sup>a</sup> p-value < .05; <sup>b</sup> p-value < .01; <sup>c</sup> p-value < .001;
